# Supplementary material for: Hydrothermal synthesis and multiferroic properties of Y2NiMnO6
Source: Royal Society of Chemistry journal article supplement (doi:10.1039/c4ra07099b), 2014-10-03
Supplement: c4ra07099b1.pdf [file c4ra07099b1.pdf]

**Electronic Supplementary Information (ESI) for RSC Advances.**

**This journal is © The Royal Society of Chemistry 2014**

Electronic Supplementary Information

## **Hydrothermal Synthesis and multiferroic properties of $Y_2NiMnO_6$**

**Chenyang Zhang,<sup>a</sup> Tingsong Zhang,<sup>a</sup> Lei Ge,<sup>a</sup> Shan Wang,<sup>b</sup> Hongming Yuan\*<sup>a</sup>, and  
Shouhua Feng<sup>a</sup>**

<sup>a</sup>State Key Laboratory of Inorganic Synthesis and Preparative Chemistry, Jilin University, Changchun, China. Email: hmyuan@jlu.edu.cn;

<sup>b</sup>Jilin Institute of Chemical Technology, The Department of Materials Science and Engineering, Jilin, China.

Table I. Structural parameters of the as-grown  $Y_2NiMnO_6$  with  $P2_1/n$  space group. The lattice parameters are  $a=5.2247(2)\text{\AA}$ ,  $b=5.5739(2)\text{\AA}$ ,  $c=7.4863(3)\text{\AA}$  and  $\beta=89.788(3)$ .

| Atom                        | X            | Y           | Z          |
|-----------------------------|--------------|-------------|------------|
| Y                           | -0.02073(34) | 0.07427(25) | 0.2502(6)  |
| Ni                          | 0.5          | 0           | 0.5        |
| Mn                          | 0.5          | 0           | 0          |
| O1                          | 0.1188(18)   | 0.4597(21)  | 0.2594(28) |
| O2                          | 0.6726(29)   | 0.2737(29)  | 0.0589(23) |
| O3                          | 0.6933(26)   | 0.3213(32)  | 0.4469(24) |
| Bond Length( $\text{\AA}$ ) |              |             |            |
| Ni-O1                       |              |             | 2.053(19)  |
| Ni-O2                       |              |             | 2.169(16)  |
| Ni-O3                       |              |             | 2.094(18)  |
| Mn-O1                       |              |             | 1.916(20)  |
| Mn-O2                       |              |             | 1.827(16)  |
| Mn-O3                       |              |             | 1.929(14)  |
| Bond Angle(Degree)          |              |             |            |
| Ni-O1-Mn                    |              |             | 141.1(5)   |
| Ni-O2-Mn                    |              |             | 145.7(9)   |
| Ni-O3-Mn                    |              |             | 143.4(9)   |

Table I. Structural parameters of the  $Y_2NiMnO_6$  annealed at 1273 K with  $P2_1/n$  space group. The lattice parameters are  $a=5.2247(2)\text{\AA}$ ,  $b=5.5739(2)\text{\AA}$ ,  $c=7.4863(3)\text{\AA}$  and  $\beta=89.788(3)$ .

| Atom                        | X            | Y           | Z           |
|-----------------------------|--------------|-------------|-------------|
| Y                           | -0.01850(18) | 0.07087(11) | 0.24956(26) |
| Ni                          | 0.5          | 0           | 0.5         |
| Mn                          | 0.5          | 0           | 0           |
| O1                          | 0.1076(9)    | 0.4621(8)   | 0.2547(11)  |
| O2                          | 0.6875(12)   | 0.2815(14)  | 0.0542(7)   |
| O3                          | 0.7030(11)   | 0.3226(14)  | 0.4464(8)   |
| Bond Length( $\text{\AA}$ ) |              |             |             |
| Ni-O1                       |              |             | 2.000(8)    |
| Ni-O2                       |              |             | 2.071(7)    |
| Ni-O3                       |              |             | 2.117(7)    |
| Mn-O1                       |              |             | 1.927(8)    |
| Mn-O2                       |              |             | 1.888(7)    |
| Mn-O3                       |              |             | 1.881(6)    |
| Bond Angle(Degree)          |              |             |             |
| Ni-O1-Mn                    |              |             | 144.43(26)  |
| Ni-O2-Mn                    |              |             | 148.31(32)  |
| Ni-O3-Mn                    |              |             | 144.49(32)  |
